1 **Early-life telomere length covaries with life-history traits**  
2 **and scales with chromosome length in birds**

3 **Running title: Avian telomere length evolution**

4 Michael Le Pepke<sup>1\*</sup>, Thor Harald Ringsby<sup>1</sup> & Dan T.A. Eisenberg<sup>2,3,4</sup>

5 <sup>1</sup>Centre for Biodiversity Dynamics (CBD), Department of Biology, Norwegian University of  
6 Science and Technology (NTNU), Trondheim, Norway

7 <sup>2</sup>Department of Anthropology, University of Washington, Seattle, WA, USA

8 <sup>3</sup>Center for Studies in Demography and Ecology, University of Washington, Seattle, WA, USA

9 <sup>4</sup>Department of Biology, University of Washington, Seattle, WA, USA

10

11 \*Correspondence: Michael Le Pepke, email: [michael@pepke.dk](mailto:michael@pepke.dk)

12

13 **Word count:** main text: 4,826; abstract: 194; 125 references; 3 figures.

14 **Key words:** c-value, genome size, pace-of-life, phylogenetic comparative analysis, telomere  
15 biology, trade-offs

## 16 **ABSTRACT**

17 Telomeres, the short DNA sequences that protect chromosome ends, are an ancient molecular  
18 structure, which is highly conserved across most eukaryotes. Species differ in their telomere  
19 lengths, but the causes of this variation are not well understood. Here, we demonstrate that mean  
20 early-life telomere length is an evolutionary labile trait across 58 bird species (representing 35  
21 families in 12 orders) with the greatest trait diversity found among passerines. Among these  
22 species, telomere length is significantly negatively associated with the fast-slow axis of life-  
23 history variation, suggesting that telomere length may have evolved to mediate trade-offs  
24 between physiological requirements underlying the diversity of pace-of-life strategies in birds.  
25 Curiously, within some species, larger individual chromosome size predicts longer telomere  
26 lengths on that chromosome, leading to the suggestion that telomere length also covaries with  
27 chromosome length across species. We show that longer mean chromosome length or genome  
28 size tends to be associated with longer mean early-life telomere length (measured across all  
29 chromosomes) within a phylogenetic framework constituting up to 32 bird species. Combined,  
30 our analyses generalize patterns previously found within a few species and provide potential  
31 adaptive explanations for the 10-fold variation in telomere lengths observed among birds.

32

## 33 **INTRODUCTION**

34 Telomeres are an ancient molecular structure which is conserved across most eukaryotes  
35 (Fulnecková et al., 2013; Meyne, Ratliff, & Moyzis, 1989). Telomeres might have emerged  
36 when linear chromosomes evolved from a circular chromosome ancestor around 1.5 billion years  
37 ago (Lee, Leek, & Levine, 2017). Their function is to protect linear chromosomes during  
38 incomplete end-replication (Blackburn & Szostak, 1984) and oxidative stress (von Zglinicki,

39 2002), and in most tetrapods mean telomere length (TL) of somatic cells shortens through life  
40 (e.g. Tricola et al., 2018). Within some species, short telomeres have been shown to correlate  
41 with shorter lifespan (Heidinger et al., 2012), increased size (Ringsby et al., 2015), and oxidative  
42 stress (Reichert & Stier, 2017). Across species, a faster rate of telomere loss has been linked to  
43 shorter maximum species lifespan in several studies (Dantzer & Fletcher, 2015; Haussmann et  
44 al., 2003; Pepke & Eisenberg, 2020; Tricola et al., 2018; Vleck, Haussmann, & Vleck, 2003;  
45 Whittemore, Vera, Martínez-Nevado, Sanpera, & Blasco, 2019). However, no consistent patterns  
46 have emerged in how absolute TL is associated with lifespan or body mass across species  
47 (Gomes et al., 2011; Haussmann et al., 2003; Pepke & Eisenberg, 2021; Seluanov et al., 2007;  
48 Tricola et al., 2018).

49         The mean TL, measured across all chromosomes, has emerged as biologically relevant  
50 trait in evolutionary, ecological, and physiological studies (Monaghan, 2010; Nussey et al.,  
51 2014). Among wild birds, mean adult TL varies from around 5 kb in Western jackdaws (*Coloews*  
52 *monedula*, Salomons et al., 2009) to more than 50 kb in great tits (*Parus major*, Tricola et al.,  
53 2018), but an evolutionary explanation for this 10-fold difference in mean TL is lacking (Tricola  
54 et al., 2018). A similar magnitude of variation is found within mammals (Gomes et al., 2011), in  
55 which TL is shorter in larger and longer-lived species (Pepke & Eisenberg, 2021). Furthermore,  
56 TL is positively associated with cancer risk across mammalian species (Pepke & Eisenberg,  
57 2021). Thus, in mammals, evolution of shorter telomeres can be explained as an adaptation to  
58 counteract the increased risk of development of tumors associated with a larger number of cells  
59 and longer time to accumulate oncogenic mutations in larger and longer-lived species (Gomes et  
60 al., 2011; Gorbunova, Seluanov, Zhang, Gladyshev, & Vijg, 2014; Pepke & Eisenberg, 2021;  
61 Risques & Promislow, 2018; Seluanov et al., 2007; Tian et al., 2018). However, no association

62 between TL and lifespan has been found in birds (Hausmann et al., 2003; Tricola et al., 2018;  
63 Vleck et al., 2003) and it is not known how TL covaries with body mass or other life-history  
64 traits in birds.

65 In life-history theory, evolutionary trade-offs are expected between vital life-history  
66 traits, such as between investment in current reproduction and investment in somatic growth,  
67 maintenance, or future reproduction (Stearns, 1989). Organisms can be placed along a fast-slow  
68 continuum of life-histories depending on how they resolve such trade-offs (Roff, 1993). A fast  
69 pace-of-life is characterized by higher investment in reproduction over survival, which is  
70 reflected in species with e.g. large clutch sizes and short generation times and lifespan (Araya-  
71 Ajoy et al., 2021; Ricklefs & Wikelski, 2002; Sæther, 1988). The variation in pace-of-life  
72 strategies is associated with physiological differences between species (Dammhahn,  
73 Dingemanse, Niemelä, & Réale, 2018; Ricklefs & Wikelski, 2002). We hypothesize that TL may  
74 have coevolved with suites of life-history traits and that TL may be used to rank species on the  
75 slow-fast axis of variation in life-history traits. Short telomeres could reflect decreased  
76 allocation of investment in somatic maintenance and hence increased allocation of resources to  
77 reproduction (Giraudeau, Angelier, & Sepp, 2019; Monaghan, 2010). However, long telomeres  
78 may be an adaptation to the cumulative negative effects of reproduction (Sudyka, 2019) and  
79 rapid growth on TL (Pepke et al., 2021), revealing the opposite relationship between TL and  
80 pace-of-life across species. We therefore investigate associations between TL and the slow-fast  
81 axis of life-history variation across species (Dantzer & Fletcher, 2015).

82 Curiously, within several species, cytogenetic studies have shown a positive correlation  
83 between the TL at a particular chromosome arm and the corresponding total chromosome length  
84 or chromosome arm length (reviewed in Klegarth & Eisenberg, 2018). This pattern has been

85 found within laboratory mice (*Mus musculus*, Zijlmans et al., 1997), Chinese hamsters  
86 (*Cricetulus griseus*, Slijepcevic & Hande, 1999), humans (*Homo sapiens*, Graakjaer et al., 2003;  
87 Mayer et al., 2006; Suda et al., 2002; Wise et al., 2009), arabidopsis (*Arabidopsis thaliana*,  
88 Shakirov & Shippen, 2004), pearl millets (*Pennisetum glaucum*, Sridevi, Uma,  
89 Sivaramakrishnan, & Isola, 2002), yeast (*Saccharomyces cerevisiae*, Berthiau et al., 2006;  
90 Craven & Petes, 1999), and Tetrahymena (*Tetrahymena thermophila*, Jacob, Stout, & Price,  
91 2004). Klegarth and Eisenberg (2018) tested whether this relationship extends across mammal  
92 species, using data on adult mean TL and mean chromosome length across 39 species of  
93 Primates and Cetartiodactyla (Gomes et al., 2011) and 11 species of Rodentia (Seluanov et al.,  
94 2007). They did not find any significant associations, but within Primates and Cetartiodactyla a  
95 positive trend between TL and chromosome length became stronger when the outlier Indian  
96 Muntjac (*Muntiacus muntjac*) was removed. Indian Muntjacs have recently undergone several  
97 whole chromosome fusions resulting in very large chromosomes (Wang & Lan, 2000). Perhaps  
98 an evolutionary lag accounts for their relatively short telomeres, which are adapted to shorter  
99 chromosomes (Klegarth & Eisenberg, 2018). Furthermore, many of the species included in past  
100 studies have been held in captivity or domesticated by humans, which might have altered their  
101 telomere length dynamics (Eisenberg, 2011; Manning, Crossland, Dewey, & Van Zant, 2002;  
102 Pepke & Eisenberg, 2021).

103       Birds may present an easier taxon with which to examine telomere–chromosome length  
104 co-evolutionary dynamics: In contrast to mammals, the avian karyotype is relatively conserved,  
105 and most birds have a chromosome number (2n) around 80 (Degrandi et al., 2020; Ellegren,  
106 2010) suggesting that inter-chromosomal rearrangements are rare in birds. However, most bird  
107 species possess several microchromosomes, which have been shown to harbor functional, but

108 ultra-long (“class III”) telomeres in some species (Atema, Mulder, van Noordwijk, & Verhulst,  
109 2019; Delany, Gessaro, Rodrigue, & Daniels, 2007; Delany, Krupkin, & Miller, 2000; Nanda &  
110 Schmid, 1994; Nanda et al., 2002; Rodrigue, May, Famula, & Delany, 2005). Not all  
111 microchromosomes possess ultra-long telomeres (and not all species with microchromosomes  
112 possess any ultra-long telomeres, Delany et al., 2000; Nanda & Schmid, 1994; Nanda et al.,  
113 2002). Furthermore, these abnormal telomeres were found only on one chromosome arm and  
114 only in some individuals of inbred domestic chickens (*Gallus gallus*), whereas TL of the  
115 opposite chromosome arm was of typical size (“class II”, Delany et al., 2007). It is therefore  
116 possible that potential telomere–chromosome dynamics vary across chromosome size ranges  
117 (Atema et al., 2019), but this is unexplored in birds. Birds have the smallest genomes among  
118 extant amniotes, which is generally thought to represent adaptations to the metabolic  
119 requirements of active flight (Kapusta, Suh, & Feschotte, 2017; Wright, Gregory, & Witt, 2014).  
120 Yet, compared to mammals, some birds seem to have a larger amount of telomere sequences  
121 (Delany et al., 2000). Indeed, some of the ultra-long telomere signals may be attributed to sub-  
122 telomeric repeats (“class P”, Ingles & Deakin, 2016, but see Atema et al., 2019), which occur in  
123 some bird species (Nanda et al., 2002).

124 Here, we use mainly TL measurements of individuals of known age to obtain estimates of  
125 an early-life TL. We first reconstruct the evolution of mean TL of 58 bird species. We then  
126 investigate how TL relates to key life-history traits of birds. We then proceed to test the  
127 hypothesis that TL covaries with chromosome length across species. We do not resolve within-  
128 genome variation in TL across chromosomes, which is largely unknown in birds (Nanda et al.,  
129 2002), but we test whether variation in mean chromosome length underlies some of the variation  
130 observed in mean TL across species.

131

## 132 **MATERIALS AND METHODS**

### 133 **Telomere length data**

134       The use of methods to estimate relative amounts of telomeric DNA within samples  
135 (qPCR) limits the feasibility of comparative studies (Nussey et al., 2014). In this study we only  
136 used TL measured via the telomere restriction fragment (TRF) method (Hausmann & Vleck,  
137 2002) or high-throughput quantitative fluorescence *in situ* hybridization (Q-FISH, Canela, Vera,  
138 Klatt, & Blasco, 2007; Lansdorp et al., 1996). In the TRF analysis, mean TL value is obtained  
139 from the distribution of TLs (in a Southern blot gel smear) across all chromosomes (Hausmann  
140 & Mauck, 2008). In the Q-FISH analysis, mean TL is obtained from the mean telomere probe  
141 fluorescence intensity across all chromosomes (quantified using microscopy image analysis,  
142 Canela et al., 2007). We searched the literature for avian telomere studies using TRF to measure  
143 mean TL from blood (Web of Science and Google Scholar [March 2021] search terms:  
144 “telomere”, “TRF”, “restriction fragment”, “Q-FISH”, “avian”, or “bird”). Correlations between  
145 TLs of various tissues suggest that blood TL is a good proxy of the TL across the organism  
146 (Daniali et al., 2013; Demanelis et al., 2020; Reichert, Criscuolo, Verinaud, Zahn, & Massemin,  
147 2013). We used TL estimates from the same lab when available to minimize methodological  
148 effects (Tricola et al., 2018). Most studies used non-denatured in-gel TRF or Q-FISH to measure  
149 functional (terminal) TLs, except for 15 species indicated in Table S1 in the Supporting  
150 Information. These studies used denatured TRF, which may include short interstitial (class I)  
151 telomeric sequences, that may lead to underestimation of the mean functional TL (Foote, Vleck,  
152 & Vleck, 2013). The size distinction between class II and III telomeres is not well-defined  
153 (Atema et al., 2019; Delany et al., 2000) and some studies may not include the complete TL

154 distribution if it is outside the range of the specific molecular size markers used (Atema et al.,  
155 2019; Foote et al., 2013; Haussmann & Mauck, 2008). However, since chromosome-specific  
156 TLs are largely unknown in birds, we rely on estimates of mean TL, which may reflect mainly  
157 “class II” telomeres.

158 To estimate an early-life TL for species with TL measurements at different reported ages,  
159 within each species we performed a linear regression of TL and individual age and used the  
160 extrapolated TL value at age 0 (i.e. the intercept, see Fig. 1 in Tricola et al., 2018). For these  
161 species, interspecific variance (97%) greatly exceeded intraspecific variance (3%) in TL,  
162 suggesting that our age correction method will only slightly change interspecific TL  
163 comparisons. For the remaining species, we used mean TL estimates for the youngest individuals  
164 reported (all <1 year old), except for 8 species (Table S1), where TL is averaged across unknown  
165 age classes. The domestic chicken was excluded because no mean TL has been reported (Delany,  
166 Daniels, Swanberg, & Taylor, 2003; Delany et al., 2000) and the chicken has a long history of  
167 human domestication, which is likely to have altered its telomere biology (Pepke & Eisenberg,  
168 2021) and genome biology (Piégu et al., 2020). Variation in the activity of telomerase, a  
169 ribonucleoprotein capable of rebuilding telomeres (reviewed in Criscuolo, Smith, Zahn,  
170 Heidinger, & Haussmann, 2018), is unmeasured in our study and may confound the estimation of  
171 early-life TL.

## 172 **Cytogenetic data**

173 For 20 species estimates of genome size (the amount of DNA in a haploid genome, i.e. c-  
174 value) measured in erythrocytes were compiled from the Animal Genome Size Database, 2.0  
175 (Gregory, 2020). When more than one c-value estimate was available in the database, we  
176 followed Gregory (2020) and averaged c-values across studies using up to four comparable



177 cytometric methodologies (Hardie, Gregory, & Hebert, 2002, see Table S1). C-values (pg) were  
178 converted to mega base pairs (Mb) by multiplying with 978 Mb/pg (Doležel, Bartoš, Voglmayr,  
179 & Greilhuber, 2003). When these estimates were not available, we searched the National Center  
180 for Biotechnology Information genetic sequence database GenBank (Clark, Karsch-Mizrachi,  
181 Lipman, Ostell, & Sayers, 2016) and recorded the length of whole genome sequence (WGS)  
182 assemblies (in Mb, 10 species, in addition to 2 species from Grayson, Sin, Sackton, & Edwards,  
183 2017, Table S1). Genome size estimates from cytometric methods are highly correlated with data  
184 obtained from WGS projects (Elliott & Gregory, 2015). Sequencing methods seem to  
185 underestimate genome size in some cases, a discrepancy that increases with absolute genome  
186 size (Elliott & Gregory, 2015). Since birds have relatively small genomes (1.0-2.2 Gb, Kapusta  
187 et al., 2017), we do not try to correct for this, but use cytometric estimates when available.  
188 Number of chromosomes was compiled from Degrandi et al. (2020). Atypical karyotypes are  
189 known from birds (Damas, O'Connor, Griffin, & Larkin, 2019; de Boer & van Brink, 1982) and  
190 we did not attempt to infer missing cytogenetic data from closely related species. Average  
191 chromosome lengths were calculated by first dividing genome size by the number of (haploid)  
192 chromosomes and then subtracting the telomeric DNA component from each chromosome  
193 (average TL multiplied by 2 representing the number of telomere arms per chromosome). For 14  
194 species the karyotype is not yet known, and we therefore also test the association between TL  
195 and genome size, as a proxy for chromosome length across 32 species.

## 196 **Life-history data**

197 Data on maximum lifespan (years) and average adult body mass (g) were compiled  
198 primarily from AnAge: The Animal Ageing and Longevity Database (Tacutu et al., 2018, Table  
199 S1 and S2), which combines data from captive and wild populations. Mean clutch size (mean

200 number of eggs laid per clutch) and generation time (in years, based on modelled values of age at  
201 first reproduction, maximum lifespan, and annual adult survival) were primarily compiled from  
202 Bird et al. (2020), see Table S1. TL, mass, lifespan, and generation time were  $\log_{10}$ -transformed  
203 to linearize relationships observed in bivariate plots. We then used a phylogenetic principal  
204 component analysis (Revell, 2009) to construct a first principal component (PC1), which  
205 explained 55% of the variation in these traits and may reflect the fast (low values) to slow (high  
206 values) axis of variation in pace-of-life strategies (Table S3, Dantzer & Fletcher, 2015; Jeschke  
207 & Kokko, 2009).

## 208 **Phylogenetic reconstruction**

209 We used the most recent time-calibrated avian phylogeny (Jetz, Thomas, Joy, Hartmann,  
210 & Mooers, 2012) based on the Hackett et al. (2008) backbone. We compiled a set of 1,000 trees  
211 from BirdTree.org and summarized these into a single maximum clade credibility tree using the  
212 maxCladeCred function in the ‘phangorn’ package in R (Schliep, 2011). This tree was pruned  
213 using the ‘ape’ package (Paradis & Schliep, 2018) and visualized using the ‘phytools’ package  
214 (Revell, 2012). Ancestral states were estimated using the function ‘fastAnc’ (Revell, 2012).

## 215 **Phylogenetic comparative analyses**

216 Phylogenetic generalized least square regressions were performed using the ‘pgls’  
217 function in ‘caper’ package (Orme et al., 2018), in which a variance-covariance matrix from the  
218 phylogenetic relationships (branch lengths) is compared to the actual covariance structure in the  
219 residual errors of the regression. The phylogenetic signal,  $\lambda$ , is a multiplier of the expected  
220 covariances (off-diagonal elements) that produces the actual variance-covariance matrix  
221 (Freckleton, Harvey, & Pagel, 2002; Pagel, 1999). Under the Pagel’s  $\lambda$  (PA) model, branch  
222 length transformations are optimized numerically using maximum likelihood within default

223 bounds (0.0-1.0, Orme et al., 2018). When  $\lambda=0$  the covariance between species is zero  
224 corresponding to a non-phylogenetic (ordinary) regression, or “star model” (ST), normally  
225 indicating that the traits are evolutionary very labile (Blomberg, Garland Jr, & Ives, 2003;  
226 Kamilar & Cooper, 2013). When  $\lambda=1$  the evolution of the residual error is best approximated by  
227 a Brownian motion (BM) model of evolution (Felsenstein, 1985), which is the case for many  
228 gradually evolving traits (Kamilar & Cooper, 2013). The phylogenetic signal therefore estimates  
229 the extent to which associations between traits reflect their shared evolutionary history  
230 (Freckleton et al., 2002), i.e. the degree of similarity among closely related species compared to  
231 distantly related species. We ran bivariate linear regressions of  $\log_{10}$ -transformed TL (response  
232 variable) and chromosome length (18 species), genome size (32 species), PC1,  $\log_{10}$ -transformed  
233 maximum lifespan, and  $\log_{10}$ -transformed body mass (58 species), respectively. We also tested  
234 associations between TL and the life-history traits while accounting for either chromosome  
235 length or genome size using phylogenetic multiple regressions (Grafen, 1989). Due to the limited  
236 sample sizes, we ran alternative evolutionary models assuming either  $\lambda=1$  (BM model),  $\lambda=0$  (ST  
237 model) or the maximum  $\lambda$  likelihood value of  $\lambda$  (PA model). We then used Akaike’s information  
238 criteria corrected for small sample sizes ( $AIC_c$ ) to determine the best model (Burnham &  
239 Anderson, 2002), which is reported in the results. All analyses were performed in R v. 3.6.3 (R  
240 Core Team, 2020).

## 241 **Sensitivity and outlier analyses**

242 We performed sensitivity and outlier analyses within the phylogenetic context to test the  
243 robustness of our results to species sampling. We used a phylogenetic leave-one-out deletion  
244 analysis implemented in the ‘sensiPhy’ package (Paterno, Penone, & Werner, 2018) to test if any  
245 species are strongly affecting the associations. Species were sequentially removed one at a time

246 and the phylogenetic regression refitted using ‘phylolm’ (Tung Ho & Ané, 2014). Highly  
247 influential species (outliers resulting in a standardized difference in  $\beta$ -estimates  $>2$ , Paterno et  
248 al., 2018) were then excluded and the regressions analyses rerun to obtain more robust  
249 phylogenetic regression estimates. We used a jackknifing method randomly removing a  
250 proportion of species (from 10 to 50%) and then refitted all regression models described above  
251 500 times to estimate sensitivity of  $\beta$ -,  $\lambda$ -, and  $p$ -values to changes in sample size (Paterno et al.,  
252 2018).

253

## 254 **RESULTS**

### 255 **Telomere length evolution**

256 The greatest diversity in early-life TL was found within Passeriformes (6.2-50.5 kb, 25  
257 species), whereas the other orders had relatively shorter and less variable TLs (7.1-34.9 kb, 33  
258 species, Fig. 1). The ancestral TL of the 58 bird species was inferred, with a wide confidence  
259 interval, to be relatively short (12.4 kb, 95% confidence interval (CI)=[-1.1, 25.8], 97.9 Mya)  
260 compared to the range of TLs observed in extant species, but close to their average TL (14.0 kb).  
261 Phylogenetic signals in life-history traits were close to 1 (Table S4), but for TL  $\lambda=0.00$   
262 (CI=[0.00, 0.46]).

### 263 **Associations between telomere length and life-history traits**

264 We found a significant negative association between TL and PC1 across all 58 species  
265 (best model:  $\beta_{PC1}=-0.003\pm 0.001$  S.E.,  $p=0.042$ , adjusted  $R^2=0.055$ ,  $\lambda=0.00$ , CI=[0.00, 0.27], Fig.  
266 2a), suggestive of shorter TL in slower life-history species. There was also a negative association  
267 between TL and maximum lifespan ( $\beta_{\log(lifespan)}=-0.230\pm 0.094$  S.E.,  $p=0.018$ , adjusted  $R^2=0.080$ ,  
268  $\lambda=0.00$ , CI=[0.00, 0.27], Fig. 2b). Thus, a 1% increase in lifespan predicted a 0.23% decrease in

269 TL. We found weak evidence for a negative association between body mass and TL ( $\beta_{\log(mass)}=-$   
270  $0.042\pm 0.026$  S.E.,  $p=0.107$ , adjusted  $R^2=0.029$ ,  $\lambda=0.00$ , CI=[0.00, 0.28], Fig. 2c).

271 We identified up to four phylogenetically significant outliers in the regressions between  
272 TL and life-history traits, but their exclusion only led to slight attenuations of the associations  
273 (see Figs. S1-S3 in the Supporting Information). These associations were generally robust to  
274 smaller sample size effects (mean change in  $\beta$  with 50% species removed was 36-52%) and the  
275 phylogenetic association was 0 in most simulations (Figs. S4-S6).

### 276 **Associations between telomere length, chromosome length and genome size**

277 Genome size positively predicted chromosome length ( $\beta_{\log(genome\ size)}=0.024\pm 0.005$  standard  
278 error [S.E.],  $p<0.001$ , adjusted  $R^2=0.599$ ,  $\lambda=1.00$ , CI=[0.00, 1.00], 18 species, Fig. S7),  
279 suggesting that genome size may be used as a proxy for chromosome length in birds.

280 We found weak evidence for a positive association between TL and chromosome length  
281 (best model:  $\beta_{\log(chromosome\ length)}=1.345\pm 1.029$  S.E.,  $p=0.210$ ,  $R^2=0.210$   $\lambda=0.00$ , CI=[0.00, 1.00],  
282 18 species, Fig. 3a). However, the phylogenetic outlier analysis identified one highly influential  
283 species, *Ciconia ciconia*, with a disproportional effect on the estimate (resulting in a change of  $\beta$   
284 of 102%, see Paterno et al., 2018 and Fig. S8). Removal of this species revealed a substantial  
285 positive association between TL and chromosome length ( $\beta_{\log(chromosome\ length)}=2.710\pm 1.106$  S.E.,  
286  $p=0.027$ ,  $R^2=0.238$   $\lambda=0.00$ , CI=[0.00, 0.99], 17 species, Fig. 3a).

287 There was a marginally significant positive association between TL and genome size  
288 (best model:  $\beta_{\log(genome\ size)}=1.420\pm 0.826$  S.E.,  $p=0.096$ , adjusted  $R^2=0.059$ , 32 species, Fig. 3b).  
289 We identified three highly influential species, *Aphelocoma coerulescens*, *Parus major*, and  
290 *Riparia riparia* ( $\beta$  changes of 50-61%, Fig. S9), the exclusion of which slightly attenuated the fit

291  $(\beta_{\log(\text{genome size})}=1.158\pm 0.742 \text{ S.E.}, p=0.130, R^2=0.049, \lambda=0.00, \text{CI}=[0.00, 0.74], 29 \text{ species, Fig.}$   
292 3b).

293 The associations between TL, chromosome length, and genome size were relatively  
294 unstable to larger reductions in sample sizes (changes in  $\beta$  with around 50% of the species  
295 removed were 45-81%, Fig. S10-S11).

### 296 **Multiple phylogenetic regressions of life-history and cytogenetic traits**

297 The associations described above between life-history traits and TL, and between  
298 cytogenetic traits and TL were slightly or substantially attenuated when included in phylogenetic  
299 multiple regressions (Table S4). Mass, lifespan, and PC1 were only weakly correlated with  
300 genome size and chromosome length (Table S5), however, sample size was considerably reduced  
301 (by 44% when including genome size [32 species] and 68% when including chromosome length  
302 [18 species]).

303

### 304 **DISCUSSION**

305 In this study, we showed that variation in mean early-life TL was significantly associated  
306 with key life-history traits underlying the pace-of-life continuum across 58 bird species. This  
307 result is consistent with the hypothesis that TL may be an important mediator of life-history  
308 trade-offs between reproduction, somatic maintenance, and cancer risk (Heidinger et al., 2012;  
309 Monaghan, 2010; Tian et al., 2018). Furthermore, we found some support for a positive  
310 association between TL and mean chromosome length or genome size. This indicates that a  
311 component of variation in TL may be constrained by interactions with chromosome length across  
312 species (Klegarth & Eisenberg, 2018; Slijepcevic, 2016).

313 Early-life TL was significantly negatively associated with maximum lifespan, but we  
314 only found weak evidence for a negative association with body mass (Fig. 2b-c). In mammals,  
315 lifespan and mass are strongly negatively associated with mean TL (Gomes et al., 2011; Pepke &  
316 Eisenberg, 2021), suggesting that these are general relationships across tetrapods. In birds, body  
317 size is constrained by adaptations to flight (Tobalske, 2016) and body masses within our study  
318 vary by almost 3 orders of magnitude compared to 7 orders of magnitude within the study of  
319 mammalian TL (Gomes et al., 2011), which may explain the weaker association between TL and  
320 mass in birds. However, there is still a large variation in TL particularly among small species,  
321 within both mammals and birds. This variation may be explained by the larger diversity of  
322 mechanisms evolved to deal with cancer defenses or cellular senescence within smaller bodied  
323 species (Risques & Promislow, 2018; Seluanov, Gladyshev, Vijg, & Gorbunova, 2018). That  
324 larger and longer-lived species of tetrapods have short telomeres, has been interpreted as an anti-  
325 cancer mechanism, limiting the risk of accumulating oncogenic mutations through replicative  
326 cell senescence (Campisi, 2001; Gorbunova et al., 2014; Pepke & Eisenberg, 2021). Research on  
327 cancer prevalence in wild bird species is very limited (Møller, Erritzøe, & Soler, 2017;  
328 Pesavento, Agnew, Keel, & Woolard, 2018). Boddy et al. (2020) found a positive relationship  
329 between litter size and cancer prevalence in 37 mammal species. They suggested that the faster  
330 pace-of-life associated with larger litter sizes, exposed fast life-history species to higher cancer  
331 rates by allocating more resources to offspring quantity than somatic maintenance. In our study,  
332 fast-lived species had a low PC1 score (i.e. short generation time and lifespan, large clutch size,  
333 and to some extent a small body mass, Table S3) and long telomeres compared to slow-lived  
334 species with a high PC1 score and short telomeres (Fig. 2a). If fast life-history bird species also  
335 have higher cancer rates, as suggested by Møller et al. (2017), these observations are consistent

336 with the fact that longer telomeres are associated with increased cancer prevalence across species  
337 (in mammals, Pepke & Eisenberg, 2021). Thus, TL may have evolved to be longer to avoid the  
338 greater risk of critically short telomeres faced by species with accelerated TL shortening due to  
339 increased oxidative stress associated with high rates of reproduction (Sudyka, 2019). Selection  
340 for longer telomeres may have been further promoted by the lower antioxidant capacity or higher  
341 levels of oxidative damage found in bird species with a faster pace-of-life (Vágási et al., 2019;  
342 Xia & Møller, 2018). Bird species with a slower pace-of-life have also been found to have a  
343 lower telomere shortening rate (Dantzer & Fletcher, 2015), which suggests that TL and TL  
344 attrition co-vary across species, but this has not yet been shown (Tricola et al., 2018).

345 The sensitivity and outlier analyses indicated that the associations between TL and  
346 cytogenetic traits were susceptible to sample size effects (Figs. S8-S11). However, our results  
347 suggest an interaction between TL evolution and karyotype evolution. We found that a 1%  
348 increase in chromosome length was associated with a 2.7% increase in TL (Fig. 3a). The  
349 taxonomic diversity of species exhibiting positive scaling between TL and chromosome length  
350 within species (reviewed in the introduction) suggests that this is a highly conserved,  
351 fundamental characteristic of telomere biology. The explanation behind the positive correlation  
352 between telomere and chromosome lengths, remains unknown, but several molecular  
353 mechanisms may be involved (Klegarth & Eisenberg, 2018).

354 Experiments in yeast have shown that if telomeric and centromeric sequences are inserted  
355 into plasmids, they become unstable, probably because they are being pulled away from each  
356 other during mitosis (Enomoto, Longtine, & Berman, 1994). Slijepcevic (2016) suggested that  
357 this telomere–centromere antagonism could explain the correlation between TL and chromosome  
358 length observed within some species, i.e. the length of telomeres closer to centromeres is shorter



359 to mitigate interference during mitosis. Furthermore, longer telomeres may be needed to protect  
360 longer chromosomes from end denaturation and rearrangements (Pampalona, Soler, Genescà, &  
361 Tusell, 2010; Slijepcevic, 1998). Supporting the connection between TL and chromosome size,  
362 Pontremoli et al. (2018) found that positive selection on genes implicated in telomere  
363 homeostasis among mammals was related to the number of chromosome arms. Given that  
364 genome size is relatively conserved among mammals (Kapusta et al., 2017), the positive  
365 selection at these genes is likely driven by chromosome size and these genes might help calibrate  
366 specific telomeres to the corresponding chromosomes. Assuming causality of the telomere–  
367 chromosome length association, more chromosome arms results in multiple short telomeres. This  
368 may facilitate chromosomal rearrangements (Murnane, 2012; Sánchez-Guillén et al., 2015;  
369 Slijepcevic, 1998), but also lead to a higher recombination rate (Pardo-Manuel de Villena &  
370 Sapienza, 2001).

371         Among mammals, the association between TL and chromosome length was highly  
372 influenced by the karyotypic abnormal Indian Muntjac (Klegarth & Eisenberg, 2018). However,  
373 the association remained non-significant after outlier exclusion. This study relied primarily on  
374 estimates of adult TL from cultured cell lines (Gomes et al., 2011). Our analysis may have better  
375 resolution by including mainly terminal TLs in early life, thereby reducing the effects of  
376 differing TL changes through life (Tricola et al., 2018). Consistent with the mammalian  
377 sensitivity to the karyotypic abnormal Indian Muntjac, our results were strongly influenced by  
378 the outlying white stork, *Ciconia ciconia* (8.8 kb, Fig. 3a), of a genus known to have undergone  
379 several chromosomal rearrangements (de Boer & van Brink, 1982, Fig. S7). For instance, *C.*  
380 *ciconia* ( $2n=72$ ) probably has many more microchromosomes than the black stork, *C. nigra*  
381 ( $2n=52$ , de Boer & van Brink, 1982), whose mean TL we may then expect to be long, but that is

382 currently unknown. The observation of ultra-long telomeres on some microchromosomes (Nanda  
383 et al., 2002) does not conform with the general patterns observed in this study. Since  
384 microchromosomes constitutes only around 23% of the avian genome size and are remarkably  
385 conserved across most bird species (Burt, 2002; O'Connor et al., 2019), it may be that the  
386 patterns reported here primarily retain to the telomere dynamics of macrochromosomes.

387         Within birds, larger genomes have been associated with lower metabolic rate  
388 (Vinogradov, 1997), reduced capacity for flight efficiency (Andrews, Mackenzie, & Gregory,  
389 2009), and increased body size (Wright et al., 2014). The mechanism underlying these  
390 correlations may be acting through a positive relationship between genome size and cell size  
391 (Wright et al., 2014). However, if part of the variation in genome size is due to variation in  
392 telomere–chromosome length interactions, we suggest that some of these associations may  
393 involve adaptations in TL to different life-history strategies, as indicated in this study. For  
394 instance, correlations between life-history traits and genome size (Womack, Metz, & Hoke,  
395 2019) may involve telomere–chromosome length dynamics.

396         We found TL to be evolutionary labile across bird species, as exemplified by the large  
397 intrageneric variation within *Aphelocoma*, *Larus*, *Tachycineta*, and *Thalassarche*, suggesting  
398 recent evolutionary change in TL (Fig. 1). Reconstructing the evolutionary history of TL changes  
399 within recent radiations of closely related species that represent independent replicated branching  
400 events, may elucidate adaptations underlying shifts in TL during speciation (Baird, 2018). As  
401 species progress through series of changes in species ecology and life-history (Pepke, Irestedt,  
402 Fjeldså, Rahbek, & Jönsson, 2019), associated changes in telomere biology may be observed  
403 within taxonomically more densely sampled clades (Canestrelli et al., 2020; Dupoué et al.,  
404 2017).

405           Our results indicate that some of the variation in early-life TL in birds arises through  
406 interactions with chromosome length, which may constrain the evolution of TL. Future cross-  
407 species studies attentive to the specificity of TL at different chromosome arms (Miga et al.,  
408 2020; Poon & Lansdorp, 2001), in particular of microchromosomes, may resolve the details of  
409 this interaction. Whether this effect has implications for telomere loss and the variation in  
410 senescence pattern across species remains unknown. However, mean TL also co-evolved with  
411 key life-history traits suggesting that the adaptive significance of TL may be as an important  
412 mediator of life-history trade-offs between investment in reproduction and somatic maintenance.

413

#### 414 **ACKNOWLEDGEMENT**

415 We thank Mark Haussmann, Gianna Tricola, Simon Verhulst, Ellis Mulder, David S.  
416 Richardson, Antoine Stier, and Tiia Kärkkäinen for sharing data on telomere lengths within bird  
417 species, Claus Bech for providing longevity data, and Christina Bauch and Pat Monaghan for  
418 comments on earlier versions of this manuscript. This work is funded by the Research Council of  
419 Norway (Centre for Biodiversity Dynamics, 223257). The authors have no conflicts of interest to  
420 declare.

421

#### 422 **AUTHOR CONTRIBUTIONS**

423 MLP and DTAE conceived the ideas. MLP compiled and analyzed data and wrote the  
424 manuscript with contributions from all authors.

425

#### 426 **DATA ACCESSIBILITY**

427 All data is available from Table S1 in the Supporting information and from BirdTree.org, and it  
428 will be submitted to an open access data repository.

429

## 430 REFERENCES

- 431 Andrews, C. B., Mackenzie, S. A., & Gregory, T. R. (2009). Genome size and wing parameters  
432 in passerine birds. *Proceedings of the Royal Society B: Biological Sciences*, 276(1654),  
433 55-61. doi:10.1098/rspb.2008.1012
- 434 Araya-Ajoy, Y. G., Niskanen, A. K., Froy, H., Ranke, P. S., Kvalnes, T., Rønning, B., . . .  
435 Wright, J. (2021). Variation in generation time reveals density regulation as an important  
436 driver of pace-of-life in a bird metapopulation. *Ecol Lett*. doi:10.1111/ele.13835
- 437 Atema, E., Mulder, E., van Noordwijk, A. J., & Verhulst, S. (2019). Ultralong telomeres shorten  
438 with age in nestling great tits but are static in adults and mask attrition of short telomeres.  
439 *Molecular Ecology Resources*, 19(3), 648-658. doi:10.1111/1755-0998.12996
- 440 Baird, D. M. (2018). Telomeres and genomic evolution. *Philosophical Transactions of the Royal  
441 Society B: Biological Sciences*, 373(1741), 20160437. doi:10.1098/rstb.2016.0437
- 442 Berthiau, A.-S., Yankulov, K., Bah, A., Revardel, E., Luciano, P., Wellinger, R. J., . . . Gilson, E.  
443 (2006). Subtelomeric proteins negatively regulate telomere elongation in budding yeast.  
444 *The EMBO Journal*, 25(4), 846-856. doi:10.1038/sj.emboj.7600975
- 445 Bird, J. P., Martin, R., Akçakaya, H. R., Gilroy, J., Burfield, I. J., Garnett, S. T., . . . Butchart, S.  
446 H. M. (2020). Generation lengths of the world's birds and their implications for extinction  
447 risk. *Conservation Biology*, 34(5), 1252-1261. doi:10.1111/cobi.13486
- 448 Blackburn, E. H., & Szostak, J. W. (1984). The molecular structure of centromeres and  
449 telomeres. *Annual Review of Biochemistry*, 53(1), 163-194.  
450 doi:10.1146/annurev.bi.53.070184.001115
- 451 Blomberg, S. P., Garland Jr, T., & Ives, A. R. (2003). Testing for phylogenetic signal in  
452 comparative data: Behavioral traits are more labile. *Evolution*, 57(4), 717-745.  
453 doi:10.1111/j.0014-3820.2003.tb00285.x
- 454 Boddy, A. M., Abegglen, L. M., Pessier, A. P., Schiffman, J. D., Maley, C. C., & Witte, C.  
455 (2020). Lifetime cancer prevalence and life history traits in mammals. *Evolution,  
456 Medicine, and Public Health*. doi:10.1093/emph/eoaa015
- 457 Burnham, K. P., & Anderson, D. R. (2002). *Model selection and multimodel inference. A  
458 practical information-theoretic approach* (2 ed.). New York, U.S.A.: Springer-Verlag.
- 459 Burt, D. W. (2002). Origin and evolution of avian microchromosomes. *Cytogenetic and Genome  
460 Research*, 96(1-4), 97-112. doi:10.1159/000063018
- 461 Campisi, J. (2001). Cellular senescence as a tumor-suppressor mechanism. *Trends Cell Biol*,  
462 11(11), S27-31. doi:10.1016/s0962-8924(01)02151-1
- 463 Canela, A., Vera, E., Klatt, P., & Blasco, M. A. (2007). High-throughput telomere length  
464 quantification by FISH and its application to human population studies. *Proceedings of  
465 the National Academy of Sciences of the United States of America*, 104(13), 5300-5305.  
466 doi:10.1073/pnas.0609367104

- 467 Canestrelli, D., Bisconti, R., Liparoto, A., Angelier, F., Ribout, C., Carere, C., & Costantini, D.  
468 (2020). Biogeography of telomere dynamics in a vertebrate. *Ecography, In press*.  
469 doi:10.1111/ecog.05286
- 470 Clark, K., Karsch-Mizrachi, I., Lipman, D. J., Ostell, J., & Sayers, E. W. (2016). GenBank.  
471 *Nucleic Acids Research*, 44(D1), D67-D72. doi:10.1093/nar/gkv1276
- 472 Craven, R. J., & Petes, T. D. (1999). Dependence of the regulation of telomere length on the type  
473 of subtelomeric repeat in the yeast *Saccharomyces cerevisiae*. *Genetics*, 152(4), 1531-  
474 1541.
- 475 Criscuolo, F., Smith, S., Zahn, S., Heidinger, B. J., & Haussmann, M. F. (2018). Experimental  
476 manipulation of telomere length: does it reveal a corner-stone role for telomerase in the  
477 natural variability of individual fitness? *Philos Trans R Soc Lond B Biol Sci*, 373(1741),  
478 20160440. doi:10.1098/rstb.2016.0440
- 479 Damas, J., O'Connor, R. E., Griffin, D. K., & Larkin, D. M. (2019). Avian chromosomal  
480 evolution. In R. H. S. Kraus (Ed.), *Avian genomics in ecology and evolution: From the*  
481 *lab into the wild* (pp. 69-92). Cham: Springer International Publishing.
- 482 Dammhahn, M., Dingemanse, N. J., Niemelä, P. T., & Réale, D. (2018). Pace-of-life syndromes:  
483 a framework for the adaptive integration of behaviour, physiology and life history.  
484 *Behavioral Ecology and Sociobiology*, 72(3), 62. doi:10.1007/s00265-018-2473-y
- 485 Daniali, L., Benetos, A., Susser, E., Kark, J. D., Labat, C., Kimura, M., . . . Aviv, A. (2013).  
486 Telomeres shorten at equivalent rates in somatic tissues of adults. *Nat Commun*, 4, 1597.  
487 doi:10.1038/ncomms2602
- 488 Dantzer, B., & Fletcher, Q. E. (2015). Telomeres shorten more slowly in slow-aging wild  
489 animals than in fast-aging ones. *Experimental gerontology*, 71, 38-47.  
490 doi:10.1016/j.exger.2015.08.012
- 491 de Boer, L. E., & van Brink, J. M. (1982). Cytotaxonomy of the Ciconiiformes (Aves), with  
492 karyotypes of eight species new to cytology. *Cytogenet Cell Genet*, 34(1-2), 19-34.  
493 doi:10.1159/000131791
- 494 Degrandi, T. M., Barcellos, S. A., Costa, A. L., Garnerio, A. D. V., Hass, I., & Gunski, R. J.  
495 (2020). Introducing the bird chromosome database: An overview of cytogenetic studies in  
496 birds. *Cytogenetic and Genome Research*, 160(4), 199-205. doi:10.1159/000507768
- 497 Delany, M. E., Daniels, L. M., Swanberg, S. E., & Taylor, H. A. (2003). Telomeres in the  
498 chicken: genome stability and chromosome ends. *Poultry Science*, 82(6), 917-926.  
499 doi:10.1093/ps/82.6.917
- 500 Delany, M. E., Gessaro, T. M., Rodrigue, K. L., & Daniels, L. M. (2007). Chromosomal  
501 mapping of chicken mega-telomere arrays to GGA9, 16, 28 and W using a cytogenomic  
502 approach. *Cytogenetic and Genome Research*, 117(1-4), 54-63. doi:10.1159/000103165
- 503 Delany, M. E., Krupkin, A. B., & Miller, M. M. (2000). Organization of telomere sequences in  
504 birds: evidence for arrays of extreme length and for in vivo shortening. *Cytogenet Cell*  
505 *Genet*, 90(1-2), 139-145. doi:10.1159/000015649
- 506 Demanelis, K., Jasmine, F., Chen, L. S., Chernoff, M., Tong, L., Delgado, D., . . . Pierce, B. L.  
507 (2020). Determinants of telomere length across human tissues. *Science*, 369(6509),  
508 eaaz6876. doi:10.1126/science.aaz6876
- 509 Doležel, J., Bartoš, J., Voglmayr, H., & Greilhuber, J. (2003). Letter to the editor. *Cytometry*  
510 *Part A*, 51A(2), 127-128. doi:10.1002/cyto.a.10013

- 511 Dupoué, A., Rutschmann, A., Le Galliard, J. F., Clobert, J., Angelier, F., Marciaud, C., . . .  
512 Meylan, S. (2017). Shorter telomeres precede population extinction in wild lizards.  
513 *Scientific Reports*, 7(1), 16976. doi:10.1038/s41598-017-17323-z
- 514 Eisenberg, D. T. (2011). An evolutionary review of human telomere biology: the thrifty telomere  
515 hypothesis and notes on potential adaptive paternal effects. *Am J Hum Biol*, 23(2), 149-  
516 167. doi:10.1002/ajhb.21127
- 517 Ellegren, H. (2010). Evolutionary stasis: the stable chromosomes of birds. *Trends in Ecology &*  
518 *Evolution*, 25(5), 283-291. doi:10.1016/j.tree.2009.12.004
- 519 Elliott, T. A., & Gregory, T. R. (2015). What's in a genome? The C-value enigma and the  
520 evolution of eukaryotic genome content. *Philosophical Transactions of the Royal Society*  
521 *B: Biological Sciences*, 370(1678), 20140331. doi:10.1098/rstb.2014.0331
- 522 Enomoto, S., Longtine, M. S., & Berman, J. (1994). TEL+CEN antagonism on plasmids involves  
523 telomere repeat sequences tracts and gene products that interact with chromosomal  
524 telomeres. *Chromosoma*, 103(4), 237-250. doi:10.1007/BF00352248
- 525 Felsenstein, J. (1985). Phylogenies and the comparative method. *American Naturalist*, 125(1), 1-  
526 15. doi:10.1086/284325
- 527 Foote, C. G., Vleck, D., & Vleck, C. M. (2013). Extent and variability of interstitial telomeric  
528 sequences and their effects on estimates of telomere length. *Molecular Ecology*  
529 *Resources*, 13(3), 417-428. doi:10.1111/1755-0998.12079
- 530 Freckleton, R. P., Harvey, P. H., & Pagel, M. (2002). Phylogenetic analysis and comparative  
531 data: A test and review of evidence. *American Naturalist*, 160(6), 712-726. doi:10.1086/343873
- 532
- 533 Fulnecková, J., Sevcíková, T., Fajkus, J., Lukesová, A., Lukes, M., Vleck, C., . . . Sykorová, E.  
534 (2013). A broad phylogenetic survey unveils the diversity and evolution of telomeres in  
535 eukaryotes. *Genome Biology and Evolution*, 5(3), 468-483. doi:10.1093/gbe/evt019
- 536 Giraudeau, M., Angelier, F., & Sepp, T. (2019). Do telomeres influence pace-of-life-strategies in  
537 response to environmental conditions over a lifetime and between generations?  
538 *Bioessays*, 41(3), 1800162. doi:10.1002/bies.201800162
- 539 Gomes, N. M., Ryder, O. A., Houck, M. L., Charter, S. J., Walker, W., Forsyth, N. R., . . .  
540 Wright, W. E. (2011). Comparative biology of mammalian telomeres: hypotheses on  
541 ancestral states and the roles of telomeres in longevity determination. *Aging Cell*, 10(5),  
542 761-768. doi:10.1111/j.1474-9726.2011.00718.x
- 543 Gorbunova, V., Seluanov, A., Zhang, Z., Gladyshev, V. N., & Vijg, J. (2014). Comparative  
544 genetics of longevity and cancer: insights from long-lived rodents. *Nature Reviews*  
545 *Genetics*, 15(8), 531-540. doi:10.1038/nrg3728
- 546 Grafen, A. (1989). The phylogenetic regression. *Philos Trans R Soc Lond B Biol Sci*, 326(1233),  
547 119-157. doi:10.1098/rstb.1989.0106
- 548 Grayson, P., Sin, S. Y. W., Sackton, T. B., & Edwards, S. V. (2017). Comparative genomics as a  
549 foundation for evo-devo studies in birds. *Methods Mol Biol*, 1650, 11-46.  
550 doi:10.1007/978-1-4939-7216-6\_2
- 551 Gregory, T. R. (2020). Animal genome size database. <http://www.genomesize.com>. Accessed  
552 01-09-2020.
- 553 Graakjaer, J., Bischoff, C., Korsholm, L., Holstebro, S., Vach, W., Bohr, V. A., . . . Kølvrå, S.  
554 (2003). The pattern of chromosome-specific variations in telomere length in humans is  
555 determined by inherited, telomere-near factors and is maintained throughout life.

- 556 *Mechanisms of Ageing and Development*, 124(5), 629-640. doi:10.1016/S0047-  
557 6374(03)00081-2
- 558 Hackett, S. J., Kimball, R. T., Reddy, S., Bowie, R. C. K., Braun, E. L., Braun, M. J., . . . Yuri,  
559 T. (2008). A phylogenomic study of birds reveals their evolutionary history. *Science*,  
560 320(5884), 1763. doi:10.1126/science.1157704
- 561 Hardie, D. C., Gregory, T. R., & Hebert, P. D. N. (2002). From pixels to picograms: A beginners'  
562 guide to genome quantification by Feulgen Image Analysis Densitometry. *Journal of*  
563 *Histochemistry & Cytochemistry*, 50(6), 735-749. doi:10.1177/002215540205000601
- 564 Haussmann, M. F., & Mauck, R. A. (2008). Technical advances: New strategies for telomere-  
565 based age estimation. *Molecular Ecology Resources*, 8(2), 264-274. doi:10.1111/j.1471-  
566 8286.2007.01973.x
- 567 Haussmann, M. F., & Vleck, C. M. (2002). Telomere length provides a new technique for aging  
568 animals. *Oecologia*, 130(3), 325-328. doi:10.1007/s00442-001-0827-y
- 569 Haussmann, M. F., Winkler, D. W., O'Reilly, K. M., Huntington, C. E., Nisbet, I. C. T., & Vleck,  
570 C. M. (2003). Telomeres shorten more slowly in long-lived birds and mammals than in  
571 short-lived ones. *Proceedings of the Royal Society of London. Series B: Biological*  
572 *Sciences*, 270(1522), 1387-1392. doi:10.1098/rspb.2003.2385
- 573 Heidinger, B. J., Blount, J. D., Boner, W., Griffiths, K., Metcalfe, N. B., & Monaghan, P. (2012).  
574 Telomere length in early life predicts lifespan. *Proc Natl Acad Sci U S A*, 109(5), 1743-  
575 1748. doi:10.1073/pnas.1113306109
- 576 Ingles, E. D., & Deakin, J. E. (2016). Telomeres, species differences, and unusual telomeres in  
577 vertebrates: presenting challenges and opportunities to understanding telomere dynamics.  
578 *AIMS Genetics*, 3(1), 1-24. doi:10.3934/genet.2016.1.1.
- 579 Jacob, N. K., Stout, A. R., & Price, C. M. (2004). Modulation of telomere length dynamics by  
580 the subtelomeric region of tetrahymena telomeres. *Molecular Biology of the Cell*, 15(8),  
581 3719-3728. doi:10.1091/mbc.e04-03-0237
- 582 Jeschke, J. M., & Kokko, H. (2009). The roles of body size and phylogeny in fast and slow life  
583 histories. *Evolutionary Ecology*, 23(6), 867-878. doi:10.1007/s10682-008-9276-y
- 584 Jetz, W., Thomas, G. H., Joy, J. B., Hartmann, K., & Mooers, A. O. (2012). The global diversity  
585 of birds in space and time. *Nature*, 491(7424), 444-448.
- 586 Kamilar, J. M., & Cooper, N. (2013). Phylogenetic signal in primate behaviour, ecology and life  
587 history. *Philosophical Transactions of the Royal Society B: Biological Sciences*,  
588 368(1618), 20120341. doi:10.1098/rstb.2012.0341
- 589 Kapusta, A., Suh, A., & Feschotte, C. (2017). Dynamics of genome size evolution in birds and  
590 mammals. *Proceedings of the National Academy of Sciences*, 114(8), E1460.  
591 doi:10.1073/pnas.1616702114
- 592 Klegarth, A. R., & Eisenberg, D. T. A. (2018). Mammalian chromosome–telomere length  
593 dynamics. *Royal Society Open Science*, 5(7), 180492. doi:10.1098/rsos.180492
- 594 Lansdorp, P. M., Verwoerd, N. P., van de Rijke, F. M., Dragowska, V., Little, M.-T., Dirks, R.  
595 W., . . . Tanke, H. J. (1996). Heterogeneity in telomere length of human chromosomes.  
596 *Human Molecular Genetics*, 5(5), 685-691. doi:10.1093/hmg/5.5.685
- 597 Lee, Y. C. G., Leek, C., & Levine, M. T. (2017). Recurrent innovation at genes required for  
598 telomere integrity in *Drosophila*. *Molecular Biology and Evolution*, 34(2), 467-482.  
599 doi:10.1093/molbev/msw248

- 600 Manning, E. L., Crossland, J., Dewey, M. J., & Van Zant, G. (2002). Influences of inbreeding  
601 and genetics on telomere length in mice. *Mammalian Genome*, *13*(5), 234-238.  
602 doi:10.1007/s003350020027
- 603 Mayer, S., Brüderlein, S., Perner, S., Waibel, I., Holdenried, A., Ciloglu, N., . . . Möller, P.  
604 (2006). Sex-specific telomere length profiles and age-dependent erosion dynamics of  
605 individual chromosome arms in humans. *Cytogenetic and Genome Research*, *112*(3-4),  
606 194-201. doi:10.1159/000089870
- 607 Meyne, J., Ratliff, R. L., & Moyzis, R. K. (1989). Conservation of the human telomere sequence  
608 (TTAGGG)<sub>n</sub> among vertebrates. *Proceedings of the National Academy of Sciences of the*  
609 *United States of America*, *86*(18), 7049-7053. doi:10.1073/pnas.86.18.7049
- 610 Miga, K. H., Koren, S., Rhie, A., Vollger, M. R., Gershman, A., Bzikadze, A., . . . Phillippy, A.  
611 M. (2020). Telomere-to-telomere assembly of a complete human X chromosome. *Nature*,  
612 *585*(7823), 79-84. doi:10.1038/s41586-020-2547-7
- 613 Monaghan, P. (2010). Telomeres and life histories. the long and the short of it. *Year in*  
614 *Evolutionary Biology*, *1206*, 130-142. doi:10.1111/j.1749-6632.2010.05705.x
- 615 Murnane, J. P. (2012). Telomere dysfunction and chromosome instability. *Mutat Res*, *730*(1-2),  
616 28-36. doi:10.1016/j.mrfmmm.2011.04.008
- 617 Møller, A. P., Erritzøe, J., & Soler, J. J. (2017). Life history, immunity, Peto's paradox and  
618 tumours in birds. *Journal of Evolutionary Biology*, *30*(5), 960-967.  
619 doi:10.1111/jeb.13060
- 620 Nanda, I., & Schmid, M. (1994). Localization of the telomeric (TTAGGG)<sub>n</sub> sequence in chicken  
621 (*Gallus domesticus*) chromosomes. *Cytogenetic and Genome Research*, *65*(3), 190-193.  
622 doi:10.1159/000133630
- 623 Nanda, I., Schrama, D., Feichtinger, W., Haaf, T., Schartl, M., & Schmid, M. (2002).  
624 Distribution of telomeric (TTAGGG)<sub>n</sub> sequences in avian chromosomes. *Chromosoma*,  
625 *111*(4), 215-227. doi:10.1007/s00412-002-0206-4
- 626 Nussey, D. H., Baird, D., Barrett, E., Boner, W., Fairlie, J., Gemmill, N., . . . Monaghan, P.  
627 (2014). Measuring telomere length and telomere dynamics in evolutionary biology and  
628 ecology. *Methods Ecol Evol*, *5*(4), 299-310. doi:10.1111/2041-210X.12161
- 629 O'Connor, R. E., Kiazim, L., Skinner, B., Fonseka, G., Joseph, S., Jennings, R., . . . Griffin, D.  
630 K. (2019). Patterns of microchromosome organization remain highly conserved  
631 throughout avian evolution. *Chromosoma*, *128*(1), 21-29. doi:10.1007/s00412-018-0685-  
632 6
- 633 Orme, D., Freckleton, R. P., Thomas, G. H., Petzoldt, T., Fritz, S. A., & Isaac, N. (2018).  
634 CAPER: comparative analyses of phylogenetics and evolution in R. *Methods in Ecology*  
635 *and Evolution*, *3*, 145-151.
- 636 Pagel, M. (1999). Inferring the historical patterns of biological evolution. *Nature*, *401*(6756),  
637 877-884. doi:10.1038/44766
- 638 Pampalona, J., Soler, D., Genescà, A., & Tusell, L. (2010). Whole chromosome loss is promoted  
639 by telomere dysfunction in primary cells. *Genes, Chromosomes and Cancer*, *49*(4), 368-  
640 378. doi:10.1002/gcc.20749
- 641 Paradis, E., & Schliep, K. (2018). ape 5.0: an environment for modern phylogenetics and  
642 evolutionary analyses in R. *Bioinformatics*, *35*(3), 526-528.  
643 doi:10.1093/bioinformatics/bty633



- 644 Pardo-Manuel de Villena, F., & Sapienza, C. (2001). Recombination is proportional to the  
645 number of chromosome arms in mammals. *Mammalian Genome*, 12(4), 318-322.  
646 doi:10.1007/s003350020005
- 647 Paterno, G. B., Penone, C., & Werner, G. D. A. (2018). sensiPhy: An r-package for sensitivity  
648 analysis in phylogenetic comparative methods. *Methods in Ecology and Evolution*, 9(6),  
649 1461-1467. doi:<https://doi.org/10.1111/2041-210X.12990>
- 650 Pepke, M. L., & Eisenberg, D. T. A. (2020). Accounting for phylogenetic relatedness in cross-  
651 species analyses of telomere shortening rates. *Experimental Results*, 1, e11.  
652 doi:10.1017/exp.2020.18
- 653 Pepke, M. L., & Eisenberg, D. T. A. (2021). On the comparative biology of mammalian  
654 telomeres: Telomere length co-evolves with body mass, lifespan and cancer risk. *Mol*  
655 *Ecol.* doi:10.1111/mec.15870
- 656 Pepke, M. L., Irestedt, M., Fjeldså, J., Rahbek, C., & Jönsson, K. A. (2019). Reconciling  
657 supertramps, great speciators and relict species with the taxon cycle stages of a large  
658 island radiation (Aves: Campephagidae). *Journal of Biogeography*, 46(6), 1214-1225.  
659 doi:10.1111/jbi.13577
- 660 Pepke, M. L., Kvalnes, T., Rønning, B., Jensen, H., Boner, W., Sæther, B.-E., . . . Ringsby, T. H.  
661 (2021). Artificial size selection experiment reveals telomere length dynamics and fitness  
662 consequences in a wild passerine. *Preprint on Authorea*.  
663 doi:10.22541/au.161447476.67562312/v1
- 664 Pesavento, P. A., Agnew, D., Keel, M. K., & Woolard, K. D. (2018). Cancer in wildlife: patterns  
665 of emergence. *Nature Reviews Cancer*, 18(10), 646-661. doi:10.1038/s41568-018-0045-0
- 666 Piégu, B., Arensburger, P., Beauclair, L., Chabault, M., Raynaud, E., Coustham, V., . . . Bigot,  
667 Y. (2020). Variations in genome size between wild and domesticated lineages of fowls  
668 belonging to the *Gallus gallus* species. *Genomics*, 112(2), 1660-1673.  
669 doi:10.1016/j.ygeno.2019.10.004
- 670 Pontremoli, C., Forni, D., Cagliani, R., Pozzoli, U., Clerici, M., & Sironi, M. (2018).  
671 Evolutionary rates of mammalian telomere-stability genes correlate with karyotype  
672 features and female germline expression. *Nucleic Acids Research*, 46(14), 7153-7168.  
673 doi:10.1093/nar/gky494
- 674 Poon, S. S. S., & Lansdorp, P. M. (2001). Measurements of telomere length on individual  
675 chromosomes by image cytometry. In *Methods in Cell Biology* (Vol. 64, pp. 69-96):  
676 Academic Press.
- 677 R Core Team. (2020). R: A language and environment for statistical computing. (Version 3.6.3).  
678 Vienna, Austria.: R Foundation for Statistical Computing. Retrieved from [www.R-](http://www.R-project.org/)  
679 [project.org/](http://www.R-project.org/)
- 680 Reichert, S., Criscuolo, F., Verinaud, E., Zahn, S., & Massemin, S. (2013). Telomere length  
681 correlations among somatic tissues in adult zebra finches. *PLoS One*, 8(12), e81496.  
682 doi:10.1371/journal.pone.0081496
- 683 Reichert, S., & Stier, A. (2017). Does oxidative stress shorten telomeres in vivo? A review.  
684 *Biology Letters*, 13(12), 20170463. doi:10.1098/rsbl.2017.0463
- 685 Revell, L. J. (2009). Size-correction and principal components for interspecific comparative  
686 studies. *Evolution*, 63(12), 3258-3268. doi:10.1111/j.1558-5646.2009.00804.x
- 687 Revell, L. J. (2012). phytools: an R package for phylogenetic comparative biology (and other  
688 things). *Methods in Ecology and Evolution*, 3(2), 217-223. doi:10.1111/j.2041-  
689 210X.2011.00169.x

- 690 Ricklefs, R. E., & Wikelski, M. (2002). The physiology/life-history nexus. *Trends in Ecology &*  
691 *Evolution*, 17(10), 462-468. doi:10.1016/S0169-5347(02)02578-8
- 692 Ringsby, T. H., Jensen, H., Pärn, H., Kvalnes, T., Boner, W., Gillespie, R., . . . Monaghan, P.  
693 (2015). On being the right size: increased body size is associated with reduced telomere  
694 length under natural conditions. *Proc Biol Sci*, 282(1820), 20152331.  
695 doi:10.1098/rspb.2015.2331
- 696 Risques, R. A., & Promislow, D. E. L. (2018). All's well that ends well: why large species have  
697 short telomeres. *Philos Trans R Soc Lond B Biol Sci*, 373(1741).  
698 doi:10.1098/rstb.2016.0448
- 699 Rodrigue, K. L., May, B. P., Famula, T. R., & Delany, M. E. (2005). Meiotic instability of  
700 chicken ultra-long telomeres and mapping of a 2.8 megabase array to the W-sex  
701 chromosome. *Chromosome Research*, 13(6), 581-591. doi:10.1007/s10577-005-0984-7
- 702 Roff, D. (1993). *Evolution of life histories: theory and analysis*: Springer Science & Business  
703 Media.
- 704 Salomons, H. M., Mulder, G. A., van de Zande, L., Haussmann, M. F., Linskens, M. H. K., &  
705 Verhulst, S. (2009). Telomere shortening and survival in free-living corvids. *Proceedings*  
706 *of the Royal Society B: Biological Sciences*, 276(1670), 3157-3165.  
707 doi:10.1098/rspb.2009.0517
- 708 Sánchez-Guillén, R. A., Capilla, L., Reig-Viader, R., Martínez-Plana, M., Pardo-Camacho, C.,  
709 Andrés-Nieto, M., . . . Ruiz-Herrera, A. (2015). On the origin of Robertsonian fusions in  
710 nature: evidence of telomere shortening in wild house mice. *Journal of Evolutionary*  
711 *Biology*, 28(1), 241-249. doi:10.1111/jeb.12568
- 712 Schliep, K. P. (2011). phangorn: phylogenetic analysis in R. *Bioinformatics*, 27(4), 592-593.  
713 doi:10.1093/bioinformatics/btq706
- 714 Seluanov, A., Chen, Z., Hine, C., Sasahara, T. H. C., Ribeiro, A. A. C. M., Catania, K. C., . . .  
715 Gorbunova, V. (2007). Telomerase activity coevolves with body mass not lifespan. *Aging*  
716 *Cell*, 6(1), 45-52. doi:10.1111/j.1474-9726.2006.00262.x
- 717 Seluanov, A., Gladyshev, V. N., Vijg, J., & Gorbunova, V. (2018). Mechanisms of cancer  
718 resistance in long-lived mammals. *Nat Rev Cancer*, 18(7), 433-441. doi:10.1038/s41568-  
719 018-0004-9
- 720 Shakirov, E. V., & Shippen, D. E. (2004). Length regulation and dynamics of individual  
721 telomere tracts in wild-type *Arabidopsis*. *The Plant Cell*, 16(8), 1959.  
722 doi:10.1105/tpc.104.023093
- 723 Slijepcevic, P. (1998). Telomeres and mechanisms of Robertsonian fusion. *Chromosoma*, 107(2),  
724 136-140. doi:10.1007/s004120050289
- 725 Slijepcevic, P. (2016). Mechanisms of the evolutionary chromosome plasticity: Integrating the  
726 'centromere-from-telomere' hypothesis with telomere length regulation. *Cytogenetic and*  
727 *Genome Research*, 148(4), 268-278. doi:10.1159/000447415
- 728 Slijepcevic, P., & Hande, M. P. (1999). Chinese hamster telomeres are comparable in size to  
729 mouse telomeres. *Cytogenet Cell Genet*, 85(3-4), 196-199. doi:10.1159/000015292
- 730 Sridevi, V., Uma, K. D., Sivaramakrishnan, S., & Isola, N. R. (2002). Telomere length as related  
731 to chromosome length in the genus *Pennisetum*. *Cytologia*, 67(2), 185-190.
- 732 Stearns, S. C. (1989). Trade-offs in life-history evolution. *Functional Ecology*, 3(3), 259-268.  
733 doi:10.2307/2389364

- 734 Suda, T., Fujiyama, A., Takimoto, M., Igarashi, M., Kuroiwa, T., Waguri, N., . . . Aoyagi, Y.  
735 (2002). Interchromosomal telomere length variation. *Biochemical and Biophysical*  
736 *Research Communications*, 291(2), 210-214. doi:10.1006/bbrc.2002.6425
- 737 Sudyka, J. (2019). Does reproduction shorten telomeres? Towards integrating individual quality  
738 with life-history strategies in telomere biology. *Bioessays*, 41(11), e1900095.  
739 doi:10.1002/bies.201900095
- 740 Sæther, B.-E. (1988). Pattern of covariation between life-history traits of European birds. *Nature*,  
741 331(6157), 616-617. doi:10.1038/331616a0
- 742 Tacutu, R., Thornton, D., Johnson, E., Budovsky, A., Barardo, D., Craig, T., . . . de Magalhaes, J.  
743 P. (2018). Human Ageing Genomic Resources: new and updated databases. *Nucleic*  
744 *Acids Research*, 46(D1), D1083-d1090. doi:10.1093/nar/gkx1042. Accessed 01-07-2020.
- 745 Tian, X., Doerig, K., Park, R., Can Ran Qin, A., Hwang, C., Neary, A., . . . Gorbunova, V.  
746 (2018). Evolution of telomere maintenance and tumour suppressor mechanisms across  
747 mammals. *Philos Trans R Soc Lond B Biol Sci*, 373(1741), 20160443.  
748 doi:10.1098/rstb.2016.0443
- 749 Tobalske, B. W. (2016). Evolution of avian flight: muscles and constraints on performance.  
750 *Philosophical transactions of the Royal Society of London. Series B, Biological sciences*,  
751 371(1704), 20150383. doi:10.1098/rstb.2015.0383
- 752 Tricola, G. M., Simons, M. J. P., Atema, E., Boughton, R. K., Brown, J. L., Dearborn, D. C., . . .  
753 Haussmann, M. F. (2018). The rate of telomere loss is related to maximum lifespan in  
754 birds. *Philosophical Transactions of the Royal Society B: Biological Sciences*, 373(1741),  
755 20160445. doi:10.1098/rstb.2016.0445
- 756 Tung Ho, L. s., & Ané, C. (2014). A linear-time algorithm for gaussian and non-gaussian trait  
757 evolution models. *Systematic Biology*, 63(3), 397-408. doi:10.1093/sysbio/syu005
- 758 Vágási, C. I., Vincze, O., Pátra, L., Osváth, G., Péntes, J., Haussmann, M. F., . . . Pap, P. L.  
759 (2019). Longevity and life history coevolve with oxidative stress in birds. *Functional*  
760 *Ecology*, 33(1), 152-161. doi:10.1111/1365-2435.13228
- 761 Vinogradov, A. E. (1997). Nucleotypic effect in homeotherms: Body-mass independent resting  
762 metabolic rate of passerine birds is related to genome size. *Evolution*, 51(1), 220-225.  
763 doi:10.1111/j.1558-5646.1997.tb02403.x
- 764 Vleck, C. M., Haussmann, M. F., & Vleck, D. (2003). The natural history of telomeres: tools for  
765 aging animals and exploring the aging process. *Experimental gerontology*, 38(7), 791-  
766 795. doi:10.1016/S0531-5565(03)00110-4
- 767 von Zglinicki, T. (2002). Oxidative stress shortens telomeres. *Trends Biochem Sci*, 27(7), 339-  
768 344.
- 769 Wang, W., & Lan, H. (2000). Rapid and parallel chromosomal number reductions in Muntjac  
770 deer inferred from mitochondrial DNA phylogeny. *Mol Biol Evol*, 17(9), 1326-1333.  
771 doi:10.1093/oxfordjournals.molbev.a026416
- 772 Whitemore, K., Vera, E., Martínez-Nevado, E., Sanpera, C., & Blasco, M. A. (2019). Telomere  
773 shortening rate predicts species life span. *Proceedings of the National Academy of*  
774 *Sciences*, 116(30), 201902452. doi:10.1073/pnas.1902452116
- 775 Wise, J. L., Crout, R. J., McNeil, D. W., Weyant, R. J., Marazita, M. L., & Wenger, S. L. (2009).  
776 Human telomere length correlates to the size of the associated chromosome arm. *PLoS*  
777 *One*, 4(6), e6013. doi:10.1371/journal.pone.0006013

- 778 Womack, M. C., Metz, M. J., & Hoke, K. L. (2019). Larger genomes linked to slower  
779 development and loss of late-developing traits. *The American Naturalist*, 194(6), 854-  
780 864. doi:10.1086/705897
- 781 Wright, N. A., Gregory, T. R., & Witt, C. C. (2014). Metabolic ‘engines’ of flight drive genome  
782 size reduction in birds. *Proceedings of the Royal Society B: Biological Sciences*,  
783 281(1779), 20132780. doi:10.1098/rspb.2013.2780
- 784 Xia, C., & Møller, A. P. (2018). Long-lived birds suffer less from oxidative stress. *Avian*  
785 *Research*, 9(1), 41. doi:10.1186/s40657-018-0133-6
- 786 Zijlmans, J. M. J. M., Martens, U. M., Poon, S. S. S., Raap, A. K., Tanke, H. J., Ward, R. K., &  
787 Lansdorp, P. M. (1997). Telomeres in the mouse have large inter-chromosomal variations  
788 in the number of T2AG3 repeats. *Proceedings of the National Academy of Sciences*,  
789 94(14), 7423-7428. doi:10.1073/pnas.94.14.7423
- 790

791 **FIGURES**

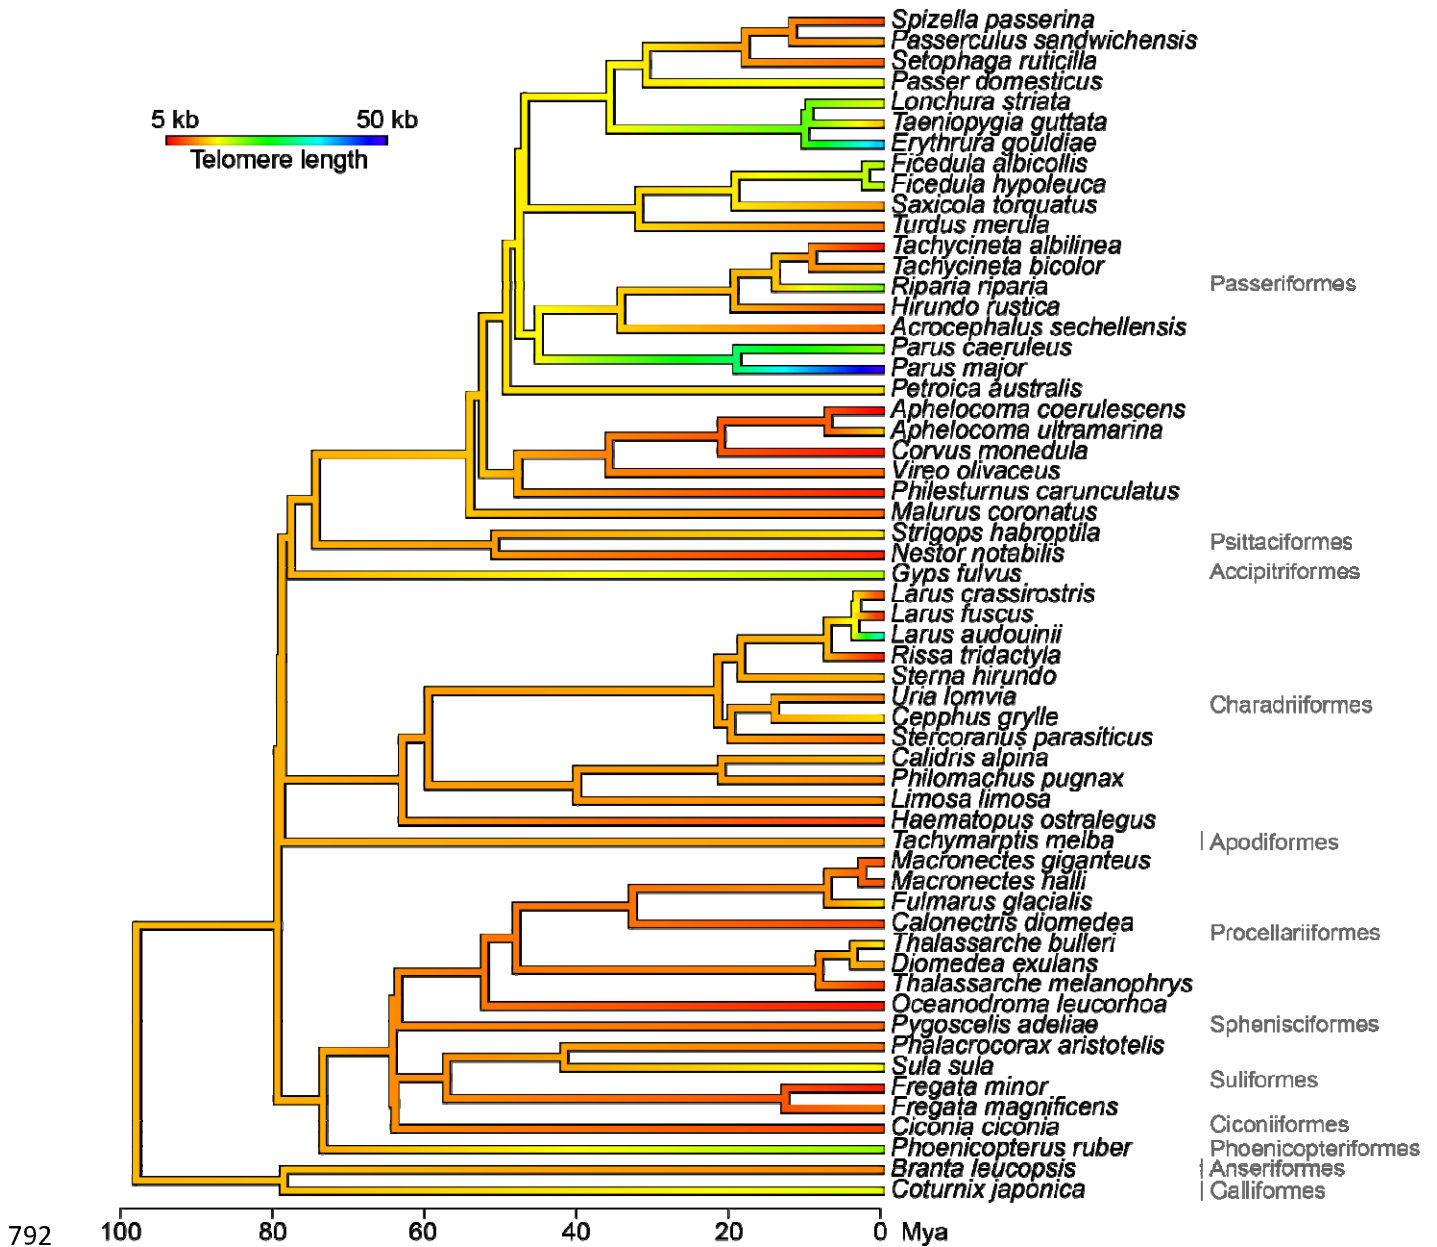

792  
793 **Fig. 1:** Calibrated maximum clade credibility tree illustrating the evolution of early-life telomere  
794 length in 58 bird species using a continuous color gradient (red: short telomeres; blue: long  
795 telomeres). Orders are shown on the right, and the timescale is in million years ago (Mya).

796

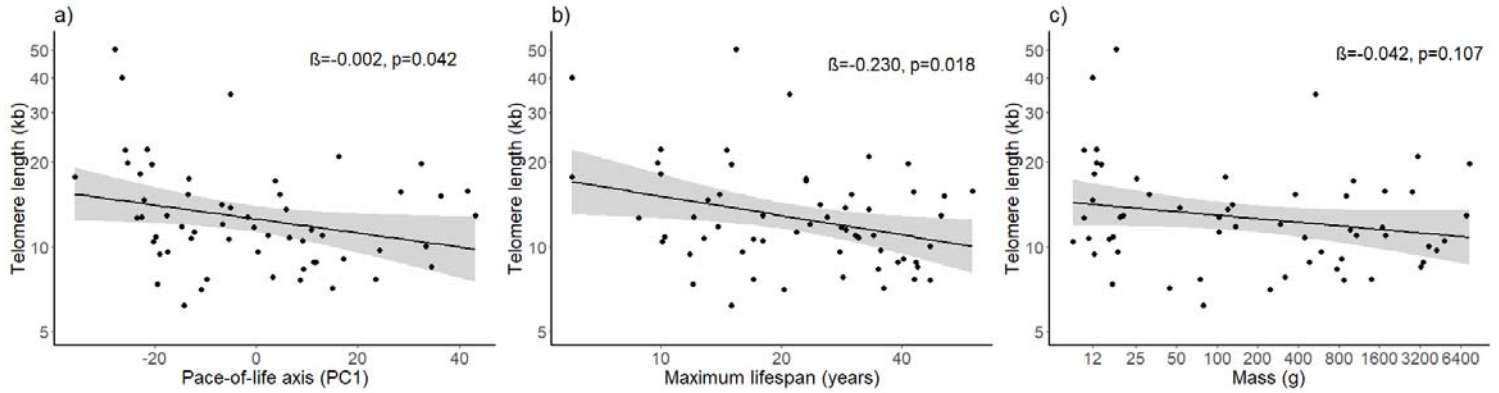

797 **Fig. 2:** Associations between  $\log_{10}$ -transformed early-life telomere length (kb) and a) PC1 scores  
 798 from a phylogenetic principal component analysis reflecting the slow-fast continuum of life-  
 799 history trait variation across 58 bird species, b)  $\log_{10}$ -transformed maximum lifespan in years,  
 800 and c)  $\log_{10}$ -transformed body mass in g. Scatter plots do not depict phylogenetic corrections.  
 801 Phylogenetic regression lines and their associated statistics are shown. Grey shadings correspond  
 802 to 95% confidence intervals.

803

804

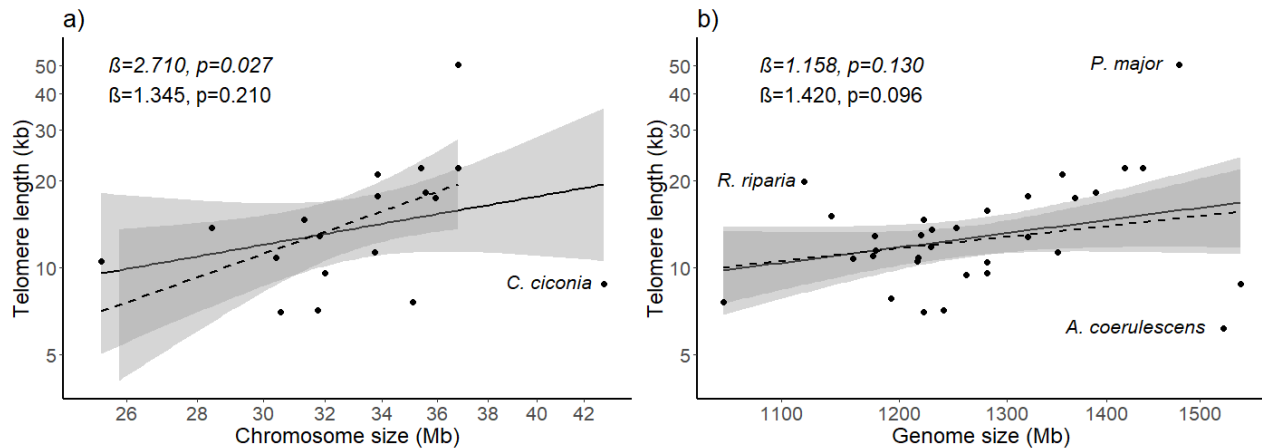

805 **Fig. 3:** Associations between average  $\log_{10}$ -transformed early-life telomere length (kb) and a)  
 806 chromosome size (Mb) for 18 bird species and b) genome size (Mb) for 32 bird species. Scatter  
 807 plots do not show phylogenetic corrections. Phylogenetic regression lines and their associated  
 808 statistics are shown (solid lines). The phylogenetically identified outliers *Ciconia Ciconia* (a),  
 809 and *Aphelocoma coerulescens*, *Parus major*, and *Riparia riparia* (b) are excluded from the  
 810 regression analyses shown in italics and with dashed regression lines. Grey shadings correspond  
 811 to 95% confidence intervals.
